# Supplementary material for: Sex- and Age-Related Differences in Morbidity Rates of 2009 Pandemic Influenza A H1N1 Virus of Swine Origin in Japan
Source: PubMed Central journal article supplement (PMC3084848; doi:10.1371/journal.pone.0019409), 2011-04-29
Supplement: pone.0019409.s001.pdf [file pone.0019409.s001.pdf]

## Appendix S1: Test statistics for comparisons of morbidity ratios

Let  $N_M$  and  $N_F$  be the subpopulations of males and females in an age group in Japanese population, i.e. fixed values, and let  $n_M$  and  $n_F$  be the random variables that describe the numbers of male and female patients with pdmH1N1 in the age group identified through  $\sim 5000$  sentinel points in Japan, respectively. Since the present sampling is based on the data reported from the sentinel points, the morbidities at the current time  $p_M$  and  $p_F$  cannot be estimated from the patient data. Let  $\pi_M$  and  $\pi_F$  be the probabilities that male and female patients in the age group visit the sentinel points, respectively. Then,  $\pi_M p_M$  and  $\pi_F p_F$  are estimated by  $\widehat{\pi_M p_M} = \frac{n_M}{N_M}$  and  $\widehat{\pi_F p_F} = \frac{n_F}{N_F}$ , respectively. In this paper,  $\gamma = \frac{\pi_M p_M}{\pi_F p_F}$  is referred to as the M/F ratio. The ratio is the apparent M/F ratio, if  $\pi_M \neq \pi_F$ , and it is the true M/F ratio if  $\pi_M = \pi_F$ . The M/F ratio is estimated by  $\widehat{\gamma} = \frac{\widehat{\pi_M p_M}}{\widehat{\pi_F p_F}} = \frac{n_M N_F}{n_F N_M}$ . Since populations  $N_M$  and  $N_F$  are very large, random variables  $n_M$  and  $n_F$  can be considered to be Poisson-distributed with means  $N_M \pi_M p_M$  and  $N_F \pi_F p_F$ , respectively. In the surveillance data, the means are sufficiently large, so from the central limit theorem,  $n_M$  and  $n_F$  are asymptotically normally distributed with variances  $N_M \pi_M p_M$  and  $N_F \pi_F p_F$ , respectively. In order to test hypotheses with respect to the M/F ratio, the following statistic can be used:

$$Z = \frac{\widehat{\pi_M p_M} - \gamma \widehat{\pi_F p_F}}{\sqrt{\frac{\widehat{\pi_M p_M}}{N_M} + \gamma^2 \frac{\widehat{\pi_F p_F}}{N_F}}} \approx \frac{\widehat{\pi_M p_M} - \gamma \widehat{\pi_F p_F}}{\sqrt{\frac{\widehat{\pi_M p_M}}{N_M} + \widehat{\gamma}^2 \frac{\widehat{\pi_F p_F}}{N_F}}}. \quad (\text{A1})$$

The above statistic is asymptotically distributed according to the standard normal distribution. Under the null hypothesis  $H_0$ , i.e.  $\gamma = 1$ , the above statistics becomes

$$Z = \frac{\pi_M \widehat{p}_M - \pi_F \widehat{p}_F}{\sqrt{\frac{\pi_M \widehat{p}_M}{N_M} + \frac{\pi_F \widehat{p}_F}{N_F}}} \approx \frac{\pi_M \widehat{p}_M - \pi_F \widehat{p}_F}{\sqrt{\frac{\pi_M \widehat{p}_M}{N_M} + \frac{\pi_F \widehat{p}_F}{N_F}}}.$$

Based on the above test statistic, we can test  $H_0: \pi_M p_M = \pi_F p_F$ , i.e.  $\gamma = 1$  vs.  $H_1: \pi_M p_M \neq \pi_F p_F$ , i.e.  $\gamma \neq 1$ .

Next, the asymptotic confidence interval of the M/F ratio  $\gamma = \frac{\pi_M p_M}{\pi_F p_F}$  is derived. For large sample, (A1) is asymptotically equal to

$$Z = \frac{\widehat{\gamma} - \gamma}{\frac{1}{\pi_F p_F} \sqrt{\frac{\pi_M \widehat{p}_M}{N_M} + \widehat{\gamma}^2 \frac{\pi_F \widehat{p}_F}{N_F}}} = \frac{\widehat{\gamma} - \gamma}{\sqrt{\widehat{\gamma}^2 \left( \frac{1}{n_M} + \frac{1}{n_F} \right)}}. \quad (\text{A2})$$

From the above standardized statistic, we have the 95% confidence interval of the M/F,

$$\widehat{\gamma} \left( 1 \pm 1.96 \sqrt{\frac{1}{n_M} + \frac{1}{n_F}} \right).$$

Finally, we can test the M/F ratio differences between pdmH1N1 and Year 2005 influenza infections using the following statistic. Let  $(p_{iM}, p_{iF}, \pi_{iM}, \pi_{iF}, \gamma_i)$  be parameters in an age group for pdmH1N1 ( $i = 1$ ) and those for Year 2005 influenza ( $i = 2$ ), which are defined above; and let  $(n_{iM}, n_{iF})$  and  $(N_{iM}, N_{iF})$  be the numbers of patients and subpopulations of males and females. From (A2), the estimators of M/F ratios,  $\widehat{\gamma}_i = \frac{n_{iM} N_{iF}}{n_{iF} N_{iM}}$  ( $i = 1, 2$ ), are asymptotically normally distributed with means  $\gamma_i$  and variances  $\sqrt{\widehat{\gamma}_i^2 \left( \frac{1}{n_{iM}} + \frac{1}{n_{iF}} \right)}$ , respectively. Since  $\widehat{\gamma}_i$  ( $i = 1, 2$ ) are independent, the following statistic is distributed according to an asymptotic normal distribution with variance 1:

$$Z_{12} = \frac{\widehat{\gamma}_1 - \widehat{\gamma}_2}{\sqrt{\widehat{\gamma}_1^2 \left( \frac{1}{n_{1M}} + \frac{1}{n_{1F}} \right) + \widehat{\gamma}_2^2 \left( \frac{1}{n_{2M}} + \frac{1}{n_{2F}} \right)}}. \quad (\text{A3})$$

By using the above statistic, we can test hypotheses,  $H_0: \gamma_1 = \gamma_2$  vs.  $H_1: \gamma_1 \neq \gamma_2$ . Under the null hypothesis, the above statistic is also asymptotically normally distributed with mean 0 and variance 1.
