# Supplementary material for: Sex- and Age-Related Differences in Morbidity Rates of 2009 Pandemic Influenza A H1N1 Virus of Swine Origin in Japan
Source: PubMed Central journal article supplement (PMC3084848; doi:10.1371/journal.pone.0019409), 2011-04-29
Supplement: pone.0019409.s002.pdf [file pone.0019409.s002.pdf]

**Table S1: The number of cases with pdmH1N1 reported from the sentinel points in Japan from July 27, 2009 to March 28, 2010**

| <b>age [yr]</b> | <b>all age</b> | <b>0</b> | <b>1</b> | <b>2</b> | <b>3</b> | <b>4</b> | <b>5</b> | <b>6</b> | <b>7</b> | <b>8</b> | <b>9</b> | <b>10-14</b> | <b>15-19</b> | <b>20-29</b> | <b>30-39</b> | <b>40-49</b> | <b>50-59</b> | <b>60-69</b> | <b>70-79</b> | <b>80-</b> |
|-----------------|----------------|----------|----------|----------|----------|----------|----------|----------|----------|----------|----------|--------------|--------------|--------------|--------------|--------------|--------------|--------------|--------------|------------|
| <b>male</b>     | 1055462        | 11342    | 26921    | 32116    | 44168    | 58661    | 70687    | 74682    | 76565    | 75508    | 73529    | 280323       | 98432        | 54835        | 37620        | 22969        | 10311        | 3734         | 2072         | 987        |
| <b>femal</b>    | 968905         | 10044    | 23222    | 28560    | 38639    | 51523    | 60816    | 64690    | 67106    | 66064    | 63305    | 239023       | 82778        | 57620        | 58505        | 33393        | 13960        | 5797         | 2508         | 1352       |
