# Supplementary material for: Sex- and Age-Related Differences in Morbidity Rates of 2009 Pandemic Influenza A H1N1 Virus of Swine Origin in Japan
Source: PubMed Central journal article supplement (PMC3084848; doi:10.1371/journal.pone.0019409), 2011-04-29
Supplement: pone.0019409.s003.pdf [file pone.0019409.s003.pdf]

**Table S2: Estimated Japanese population as of October 2009 (x 1,000)**

| <b>age [yr]</b> | <b>all ages</b> | <b>0</b> | <b>1</b> | <b>2</b> | <b>3</b> | <b>4</b> | <b>5</b> | <b>6</b> | <b>7</b> | <b>8</b> | <b>9</b> | <b>10-14</b> | <b>15-19</b> | <b>20-29</b> | <b>30-39</b> | <b>40-49</b> | <b>50-59</b> | <b>60-69</b> | <b>70-79</b> | <b>80-</b> |
|-----------------|-----------------|----------|----------|----------|----------|----------|----------|----------|----------|----------|----------|--------------|--------------|--------------|--------------|--------------|--------------|--------------|--------------|------------|
| <b>total</b>    | 127510          | 1078     | 1092     | 1084     | 1072     | 1050     | 1088     | 1111     | 1145     | 1160     | 1180     | 5949         | 6079         | 14417        | 18306        | 16407        | 16872        | 17798        | 12722        | 7899       |
| <b>male</b>     | 62130           | 553      | 560      | 556      | 550      | 536      | 557      | 570      | 587      | 595      | 606      | 3047         | 3113         | 7382         | 9279         | 8256         | 8380         | 8609         | 5725         | 2671       |
| <b>female</b>   | 65380           | 525      | 532      | 528      | 522      | 513      | 532      | 542      | 558      | 565      | 574      | 2902         | 2967         | 7034         | 9027         | 8152         | 8493         | 9189         | 6997         | 5229       |
