# Supplementary material for: Sex- and Age-Related Differences in Morbidity Rates of 2009 Pandemic Influenza A H1N1 Virus of Swine Origin in Japan
Source: PubMed Central journal article supplement (PMC3084848; doi:10.1371/journal.pone.0019409), 2011-04-29
Supplement: pone.0019409.s004.pdf [file pone.0019409.s004.pdf]

**Table S3: The number of cases with influenza reported from the sentinel points (per 100,000)**

| age [yr]      | all ages            | 0      | 1      | 2      | 3      | 4      | 5       | 6       | 7       | 8       | 9       | 10-14   | 15-19  | 20-29  | 30-39 | 40-49 | 50-59 | 60-69 | 70-79 | 80-   |       |
|---------------|---------------------|--------|--------|--------|--------|--------|---------|---------|---------|---------|---------|---------|--------|--------|-------|-------|-------|-------|-------|-------|-------|
| <b>male</b>   | <b>2000</b>         | 633.5  | 1282.6 | 3532.7 | 3849.0 | 4282.5 | 4825.9  | 5238.5  | 4864.8  | 4767.5  | 3550.8  | 2539.6  | 1539.3 | 576.8  | 235.2 | 276.7 | 195.0 | 115.7 | 104.7 | 94.5  | 75.4  |
|               | <b>2001</b>         | 250.6  | 601.7  | 1608.2 | 1715.1 | 1844.1 | 2009.5  | 1968.4  | 1715.7  | 1405.8  | 1211.5  | 1012.9  | 634.1  | 222.0  | 117.1 | 124.7 | 72.7  | 36.3  | 29.5  | 27.6  | 27.3  |
|               | <b>2002</b>         | 611.1  | 1582.0 | 4003.3 | 4345.4 | 4704.8 | 4544.5  | 4475.6  | 3783.1  | 3672.4  | 3220.4  | 3095.9  | 2198.0 | 543.5  | 211.4 | 231.6 | 144.6 | 59.5  | 44.8  | 39.1  | 36.7  |
|               | <b>2003</b>         | 945.0  | 2666.1 | 6095.5 | 6211.3 | 6712.2 | 7357.2  | 6499.7  | 6006.2  | 5702.5  | 5311.0  | 4742.2  | 3348.1 | 1020.3 | 330.0 | 309.3 | 231.6 | 120.3 | 96.7  | 93.9  | 109.7 |
|               | <b>2004</b>         | 625.6  | 1641.5 | 4233.8 | 3826.7 | 4055.2 | 4433.3  | 3837.0  | 2951.0  | 2664.8  | 2590.9  | 2769.6  | 2538.1 | 1032.0 | 280.0 | 234.0 | 179.8 | 84.0  | 66.1  | 69.7  | 82.9  |
|               | <b>2005</b>         | 1253.2 | 2693.9 | 7453.0 | 7941.5 | 9071.5 | 10633.9 | 10954.9 | 10438.0 | 8778.0  | 7719.0  | 6529.2  | 2893.2 | 496.9  | 503.4 | 594.5 | 473.3 | 265.4 | 192.3 | 185.3 | 224.0 |
|               | <b>2006</b>         | 732.7  | 1730.8 | 4594.4 | 4665.0 | 5018.5 | 5800.0  | 6052.8  | 5332.4  | 5009.2  | 4232.8  | 3652.6  | 2208.3 | 671.7  | 295.8 | 300.4 | 240.2 | 123.2 | 83.5  | 83.4  | 100.4 |
|               | <b>2007</b>         | 994.7  | 1767.8 | 4746.4 | 5198.3 | 6028.6 | 7220.8  | 7521.0  | 7492.3  | 7448.4  | 7002.8  | 6103.1  | 4134.8 | 1010.5 | 371.9 | 335.9 | 267.2 | 130.9 | 81.2  | 82.6  | 95.3  |
|               | <b>2008</b>         | 509.3  | 1140.0 | 2828.7 | 2963.0 | 3688.5 | 4527.4  | 5120.6  | 4589.3  | 3897.8  | 3223.7  | 2882.6  | 1464.3 | 360.5  | 228.1 | 224.9 | 152.4 | 58.6  | 30.4  | 26.4  | 27.9  |
|               | <b>mean (00-08)</b> | 728.5  | 1664.4 | 4324.0 | 4513.0 | 5035.9 | 5693.4  | 5741.7  | 5228.5  | 4810.9  | 4227.0  | 3696.1  | 2313.0 | 655.6  | 281.9 | 294.0 | 216.6 | 110.7 | 80.9  | 78.6  | 87.5  |
|               | <b>pdmH1N1</b>      | 1698.8 | 2051.0 | 4807.3 | 5776.3 | 8030.5 | 10944.2 | 12690.7 | 13102.1 | 13043.4 | 12690.4 | 12133.5 | 9200.0 | 3162.0 | 742.8 | 405.4 | 278.2 | 123.0 | 43.4  | 36.2  | 37.0  |
| <b>female</b> | <b>2000</b>         | 577.5  | 1187.9 | 3178.2 | 3690.0 | 4000.3 | 4625.1  | 4836.3  | 4591.3  | 4516.6  | 3427.9  | 2466.8  | 1396.3 | 490.9  | 302.2 | 378.1 | 196.4 | 129.0 | 109.8 | 77.2  | 50.2  |
|               | <b>2001</b>         | 229.8  | 533.2  | 1392.6 | 1581.2 | 1668.4 | 1880.1  | 1788.2  | 1572.4  | 1355.9  | 1164.1  | 970.0   | 586.1  | 189.3  | 150.4 | 181.2 | 76.0  | 42.5  | 33.3  | 23.2  | 19.3  |
|               | <b>2002</b>         | 562.4  | 1485.4 | 3646.9 | 4072.4 | 4322.6 | 4315.8  | 4077.8  | 3588.8  | 3443.6  | 3102.5  | 3043.1  | 2051.2 | 485.0  | 288.1 | 364.4 | 165.2 | 72.9  | 52.9  | 32.7  | 26.7  |
|               | <b>2003</b>         | 878.0  | 2531.5 | 5613.1 | 5963.6 | 6254.1 | 6951.7  | 6010.3  | 5768.0  | 5391.9  | 5107.8  | 4502.5  | 3097.4 | 927.0  | 460.3 | 508.1 | 292.5 | 145.4 | 110.4 | 77.7  | 84.2  |
|               | <b>2004</b>         | 581.7  | 1496.9 | 3870.0 | 3658.0 | 3811.8 | 4250.4  | 3622.3  | 2771.0  | 2571.7  | 2497.7  | 2590.3  | 2302.5 | 961.5  | 356.8 | 371.5 | 227.3 | 101.2 | 79.1  | 60.8  | 67.9  |
|               | <b>2005</b>         | 1195.8 | 2525.7 | 6676.5 | 7569.3 | 8424.6 | 10031.2 | 10251.5 | 9918.4  | 8340.7  | 7547.0  | 6363.5  | 2734.4 | 476.6  | 690.0 | 928.9 | 542.6 | 311.7 | 218.2 | 162.1 | 188.4 |
|               | <b>2006</b>         | 677.7  | 1596.0 | 4093.8 | 4399.4 | 4664.4 | 5535.9  | 5612.0  | 5071.2  | 4785.4  | 4080.7  | 3559.3  | 2079.8 | 623.2  | 380.5 | 450.9 | 266.9 | 135.8 | 92.2  | 70.2  | 75.0  |
|               | <b>2007</b>         | 904.7  | 1625.0 | 4376.1 | 4825.6 | 5581.1 | 6762.4  | 6826.7  | 6926.6  | 6993.6  | 6653.3  | 5781.3  | 3796.0 | 870.0  | 496.4 | 519.2 | 326.3 | 157.3 | 95.8  | 72.8  | 76.8  |
|               | <b>2008</b>         | 459.7  | 1066.2 | 2601.9 | 2775.5 | 3331.1 | 4165.5  | 4644.5  | 4266.7  | 3637.6  | 3099.3  | 2711.5  | 1353.0 | 299.7  | 277.6 | 328.0 | 169.7 | 70.9  | 35.9  | 22.7  | 21.8  |
|               | <b>mean (00-08)</b> | 674.5  | 1549.0 | 3923.2 | 4272.5 | 4665.1 | 5378.6  | 5295.5  | 4929.0  | 4553.6  | 4075.7  | 3548.3  | 2140.8 | 588.0  | 373.0 | 450.5 | 250.5 | 129.8 | 91.9  | 67.0  | 69.1  |
|               | <b>pdmH1N1</b>      | 1482.0 | 1913.1 | 4365.0 | 5409.1 | 7402.1 | 10043.5 | 11431.6 | 11935.4 | 12026.2 | 11692.7 | 11028.7 | 8236.5 | 2790.0 | 819.2 | 648.1 | 409.6 | 164.4 | 63.1  | 35.8  | 25.9  |
