# Supplementary material for: Sex- and Age-Related Differences in Morbidity Rates of 2009 Pandemic Influenza A H1N1 Virus of Swine Origin in Japan
Source: PubMed Central journal article supplement (PMC3084848; doi:10.1371/journal.pone.0019409), 2011-04-29
Supplement: pone.0019409.s005.pdf [file pone.0019409.s005.pdf]

**Table S4: M/F ratio**

| <b>age [yr]</b>     | <b>all ages</b> | <b>0</b> | <b>1</b> | <b>2</b> | <b>3</b> | <b>4</b> | <b>5</b> | <b>6</b> | <b>7</b> | <b>8</b> | <b>9</b> | <b>10-14</b> | <b>15-19</b> | <b>20-29</b> | <b>30-39</b> | <b>40-49</b> | <b>50-59</b> | <b>60-69</b> | <b>70-79</b> | <b>80-</b> |
|---------------------|-----------------|----------|----------|----------|----------|----------|----------|----------|----------|----------|----------|--------------|--------------|--------------|--------------|--------------|--------------|--------------|--------------|------------|
| <b>2000</b>         | 1.097           | 1.080    | 1.112    | 1.043    | 1.071    | 1.043    | 1.083    | 1.060    | 1.056    | 1.036    | 1.030    | 1.102        | 1.175        | 0.778        | 0.732        | 0.993        | 0.897        | 0.954        | 1.225        | 1.502      |
| <b>2001</b>         | 1.091           | 1.128    | 1.155    | 1.085    | 1.105    | 1.069    | 1.101    | 1.091    | 1.037    | 1.041    | 1.044    | 1.082        | 1.173        | 0.778        | 0.688        | 0.957        | 0.853        | 0.884        | 1.190        | 1.412      |
| <b>2002</b>         | 1.087           | 1.065    | 1.098    | 1.067    | 1.088    | 1.053    | 1.098    | 1.054    | 1.066    | 1.038    | 1.017    | 1.072        | 1.121        | 0.734        | 0.636        | 0.875        | 0.816        | 0.846        | 1.196        | 1.372      |
| <b>2003</b>         | 1.076           | 1.053    | 1.086    | 1.042    | 1.073    | 1.058    | 1.081    | 1.041    | 1.058    | 1.040    | 1.053    | 1.081        | 1.101        | 0.717        | 0.609        | 0.792        | 0.827        | 0.875        | 1.209        | 1.302      |
| <b>2004</b>         | 1.076           | 1.097    | 1.094    | 1.046    | 1.064    | 1.043    | 1.059    | 1.065    | 1.036    | 1.037    | 1.069    | 1.102        | 1.073        | 0.785        | 0.630        | 0.791        | 0.830        | 0.835        | 1.147        | 1.220      |
| <b>2005</b>         | 1.048           | 1.067    | 1.116    | 1.049    | 1.077    | 1.060    | 1.069    | 1.052    | 1.052    | 1.023    | 1.026    | 1.058        | 1.043        | 0.730        | 0.640        | 0.872        | 0.851        | 0.881        | 1.143        | 1.189      |
| <b>2006</b>         | 1.081           | 1.084    | 1.122    | 1.060    | 1.076    | 1.048    | 1.079    | 1.052    | 1.047    | 1.037    | 1.026    | 1.062        | 1.078        | 0.777        | 0.666        | 0.900        | 0.907        | 0.905        | 1.187        | 1.339      |
| <b>2007</b>         | 1.099           | 1.088    | 1.085    | 1.077    | 1.080    | 1.068    | 1.102    | 1.082    | 1.065    | 1.053    | 1.056    | 1.089        | 1.162        | 0.749        | 0.647        | 0.819        | 0.832        | 0.848        | 1.135        | 1.242      |
| <b>2008</b>         | 1.108           | 1.069    | 1.087    | 1.068    | 1.107    | 1.087    | 1.103    | 1.076    | 1.072    | 1.040    | 1.063    | 1.082        | 1.203        | 0.822        | 0.686        | 0.898        | 0.827        | 0.848        | 1.160        | 1.279      |
| <b>mean (00-08)</b> | 1.080           | 1.075    | 1.102    | 1.056    | 1.079    | 1.059    | 1.084    | 1.061    | 1.057    | 1.037    | 1.042    | 1.080        | 1.115        | 0.756        | 0.653        | 0.865        | 0.853        | 0.881        | 1.174        | 1.266      |
| <b>pdmH1N1</b>      | 1.146           | 1.072    | 1.101    | 1.068    | 1.085    | 1.090    | 1.110    | 1.098    | 1.085    | 1.085    | 1.100    | 1.117        | 1.133        | 0.907        | 0.626        | 0.679        | 0.749        | 0.688        | 1.010        | 1.429      |
